# Supplementary material
Source: PubMed Central journal article supplement (PMC11027872)
Supplement: 262_2019_2440_MOESM1_ESM.pdf [file 262_2019_2440_MOESM1_ESM.pdf]

## Supplementary Figure 1

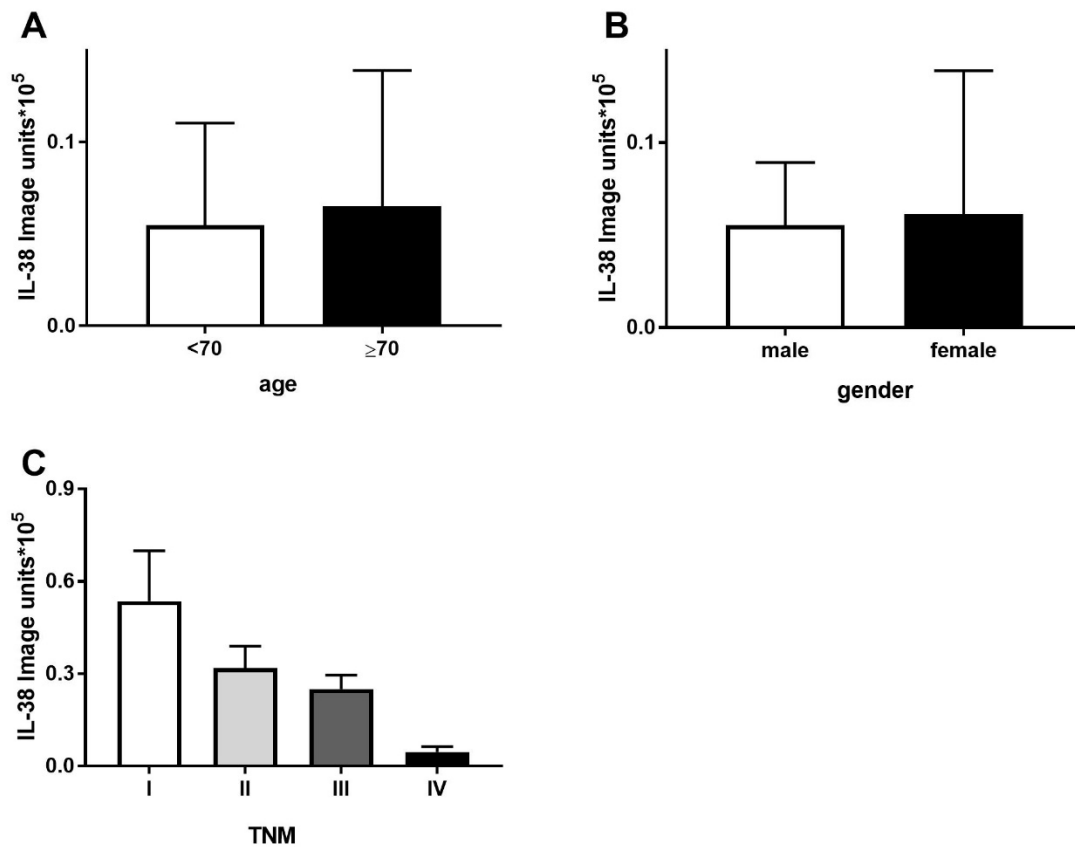

**Supplementary Figure 1.** Comparison of IL-38 expression in CRC as a function of age (A), sex (B) and TNM (C), analysed by using the Mann-Whitney U test. The y-axis represents the arbitrary units of IL-38 expression. There were no statistically significant differences.
